# Supplementary material
Source: MDPI journal article supplement (https://www.mdpi.com/2039-4713/14/1/8)
Supplement: s1 [file s1]

## Supplemental Material

### Title

Silica nanoparticles disclose a detailed neurodegeneration profile throughout the life span of a model organism.

### Authors

Annette Limke<sup>1</sup>, Gereon Poschmann<sup>2</sup>, Kai Stühler<sup>3</sup>, Patrick Petzsch<sup>4</sup>, Thorsten Wachtmeister<sup>4</sup> and Anna von Mikecz<sup>1,\*</sup>

### Affiliations

<sup>1</sup>IUF – Leibniz Research Institute of Environmental Medicine GmbH, Auf'm Hennekamp 50, 40225 Duesseldorf, Germany

<sup>2</sup>Institute of Molecular Medicine, Proteome Research, Medical Faculty and University Hospital, Heinrich Heine University Düsseldorf, 40225 Düsseldorf, Germany

<sup>3</sup>Molecular Proteomics Laboratory, BMFZ, Heinrich Heine University Düsseldorf, 40225 Düsseldorf, Germany

<sup>4</sup>Biological and Medical Research Center (BMFZ), Medical Faculty, Heinrich-Heine-University, Universitätsstraße 1, 40225 Duesseldorf, Germany

\*Correspondence: [mikecz@tec-source.de](mailto:mikecz@tec-source.de); Tel.: +49-221-3389-358

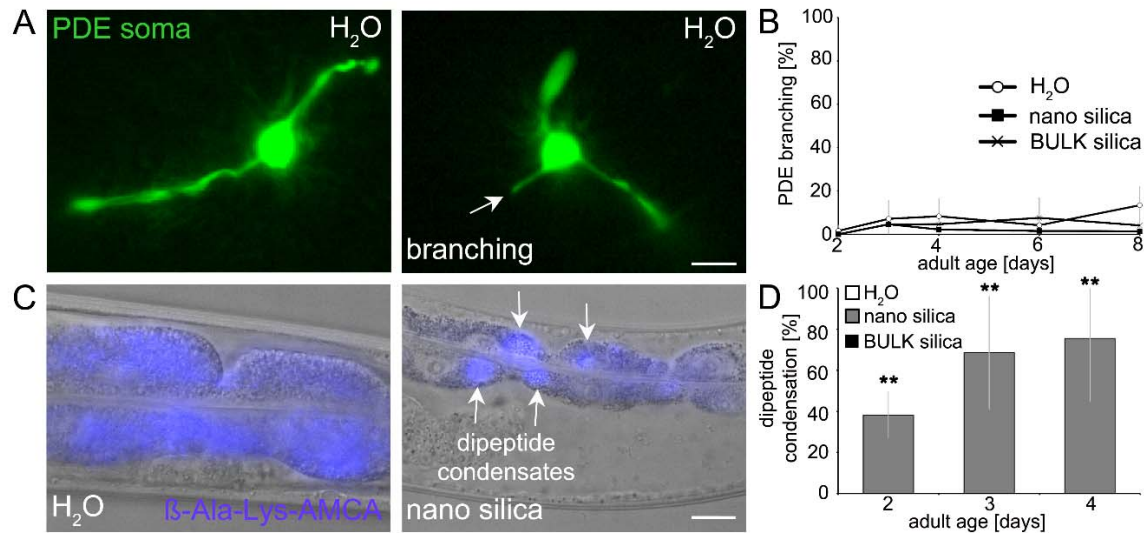

**Figure S1. Nano silica induced no branching of PDE dendrites, but dipeptide condensation in intestinal epithelial cells.** (A) Representative fluorescent micrographs of an 8-day-old, adult reporter worm (*dat-1p::GFP*) expressing green fluorescent protein (GFP) under control of the dopamine transporter (*dat-1*) promoter in the soma and dendritic processes of dopaminergic neuron PDE (left). A subset of PDE neurons show outgrowth of additional dendritic processes (right, arrow). (B) Quantification of the PDE branching phenotype in 2- to 8-day-old worms that were mock-exposed (H<sub>2</sub>O), or exposed to 200 µg/ mL nano silica or BULK silica. Only low numbers of extra branches were counted in H<sub>2</sub>O controls, nano silica-exposed or BULK silica-exposed 2-day- to 8-day-old *C. elegans*. No significant differences were observed between negative controls and particle-treated groups. Values represent means ± SD from 3-6 independent experiments with n=20-27 worms per condition per experiment. Bar, 6 µm. (C) Representative fluorescent micrographs show the localization of fluorescent dipeptide conjugate β-Ala-Lys-AMCA (blue) in intestinal cells of 4-day-old, adult wild type (N2) *C. elegans*. Nematodes were mock-exposed (H<sub>2</sub>O) or exposed to 200 µg/ mL nano silica for 72 hours at 20 °C. β-Ala-Lays-AMCA staining indicates diffuse peptide distribution in mock-exposed worms (left micrograph) and formation of peptide condensates (arrows) in nano silica-exposed worms (right micrograph). (D) Quantification of dipeptide condensates in 2- to 4-day-old mock-exposed worms or worms exposed to 200 µg/ mL nano or BULK silica. Significant differences were observed between negative controls, BULK silica controls and nano silica-exposed nematodes. Nano silica induced shrinkage of intestinal epithelial cells and redistribution of normally diffusely distributed dipeptides to dipeptide condensates. Bar graphs show mean values ± SD from three independent experiments with n=20-28 per condition per experiment (One-way ANOVA with Tukey's post hoc test). Note that in D values of H<sub>2</sub>O and BULK are below 1%. Bar, 10 µm. \*\*, p<0.01.

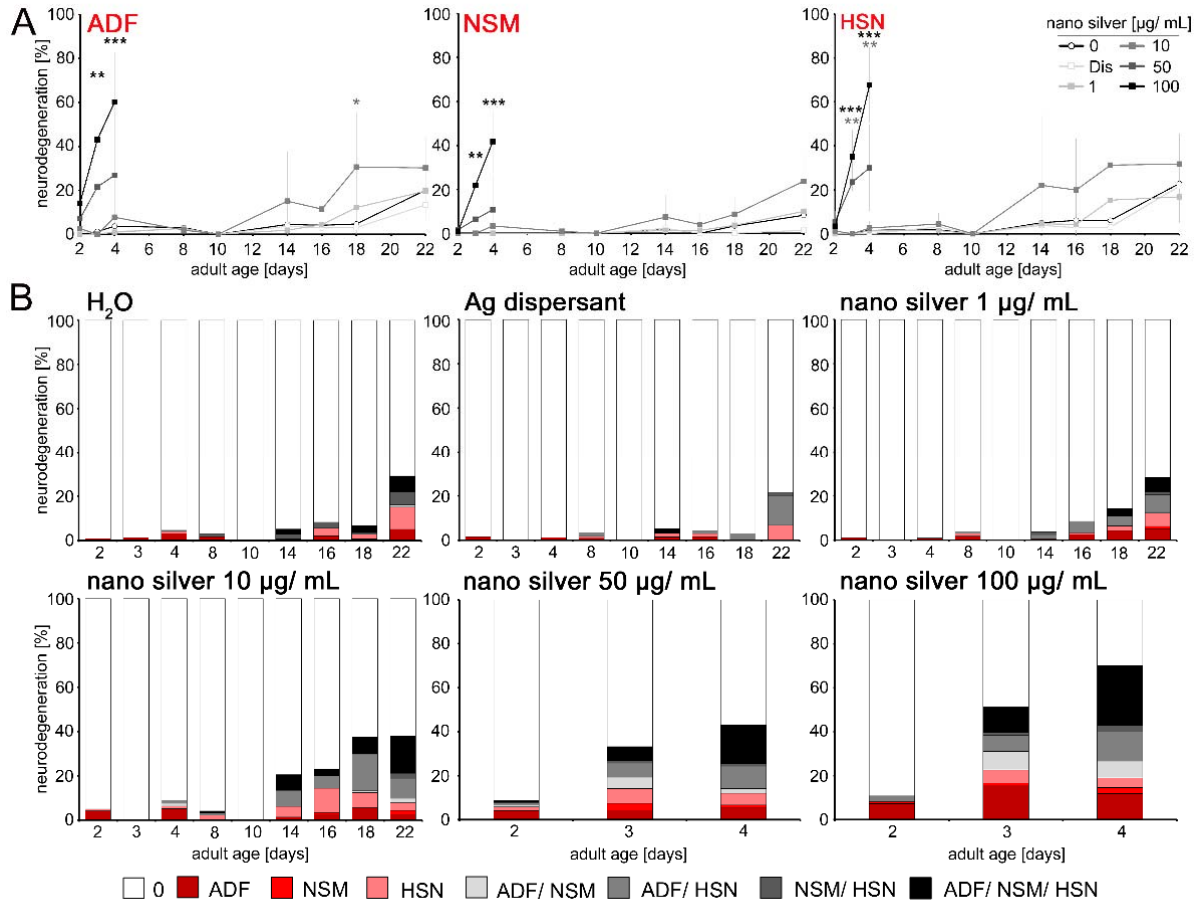

**Figure S2. Patterns of nano silver-induced neurodegeneration during adult life of the nematode *C. elegans*.**

One-day-old wild-type (N2) nematodes were mock-exposed (H<sub>2</sub>O or dispersant) or exposed to increasing concentrations of nano silver. (A) Quantification of neurodegeneration in dendrites of the serotonergic neurons ADF, NSM and HSN in 2- to 22-day-old nematodes. Line graphs represent means  $\pm$  SD from 4-7 independent experiments with n=7-34 per condition per experiment (One-way ANOVA with Tukey's post hoc test). (B) Quantification of neurodegeneration with respect to specific neurons and exposures. Note, that at concentrations of > 50  $\mu$ g/ mL neurodegeneration was only observable until day 4 of adulthood due to a high mortality rate of nano silver. At nano silver concentrations between 0 and 10  $\mu$ g/ mL neurodegeneration was observed predominately in old *C. elegans* affecting single serotonergic neurons or combinations of serotonergic neurons. A significant acceleration of neurodegeneration was observed at 10  $\mu$ g/ mL nano silver in old (18-day-old) nematodes. Dis, dispersant only; \*, p<0.05; \*\*, p<0.01; \*\*\*, p<0.001.

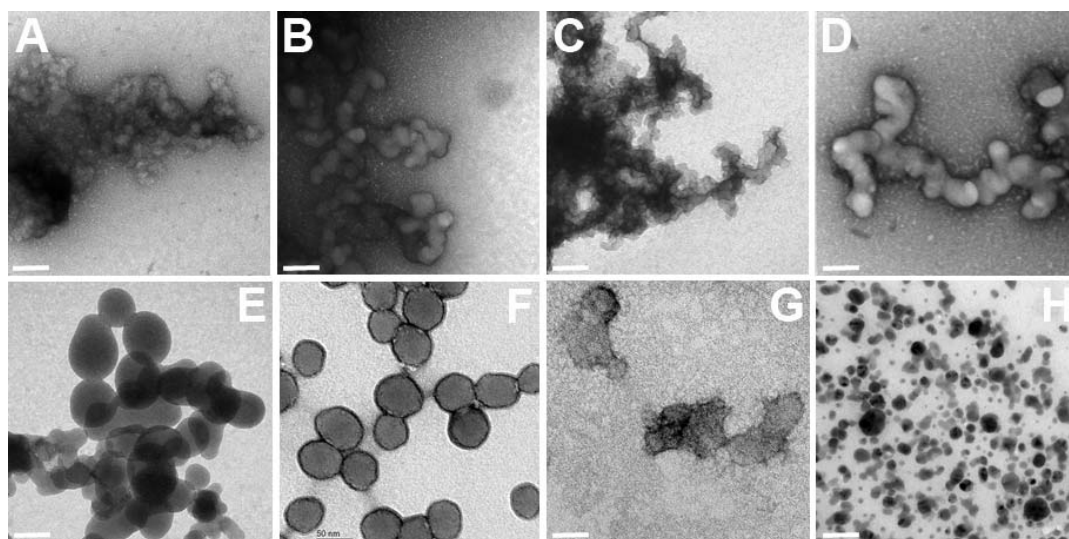

**Figure S3** Transmission electron micrographs (TEMs) of nano silica, BULK silica and nano silver particles. (A) 7 nm nano silica, Sigma-Aldrich, (B) 12 nm nano silica, Aerosil 200, Evonic, (C) 14 nm nano silica, Sigma-Aldrich, (D) 20 nm nano silica, Aerosil 90, Evonic, (E) 40 nm nano silica, Aerosil OX50, Evonic, (F) 50 nm nano silica, Kisker, (G) 500-1000 nm BULK silica, Sigma-Aldrich, (H) nano silver, NM300k, European Union Joint Research Center (JRC). Bars, 50 nanometers.

**Table S1.** Biophysical properties and synthesis of silica and silver particles.

| Particles   | Diameter, nm | Zeta potential, mV | Synthesis | Source                   | TEM <sup>1</sup> | Diameter, nm <sup>2</sup> |
|-------------|--------------|--------------------|-----------|--------------------------|------------------|---------------------------|
| nano silica | 7            |                    | HTFH      | Sigma-Aldrich            | yes              |                           |
| nano silica | 12           |                    | HTFH      | Aerosil 200, Evonic      | yes              |                           |
| nano silica | 14           | -9.73              | HTFH      | Sigma-Aldrich            | yes              |                           |
| nano silica | 20           | -24.5              | HTFH      | Aerosil 90, Evonic       | yes              |                           |
| nano silica | 40           |                    | HTFH      | Aerosil OX 50, Evonic    | yes              |                           |
| nano silica | 50           | -48.7              | Stoeber   | Kisker Biotech           | yes              | 46 ± 7                    |
| BULK silica | 200          |                    | Stoeber   | Kisker Biotech           | nd               |                           |
| BULK silica | 500-1000     | -11.8              | HTFH      | Sigma-Aldrich            | yes              |                           |
| nano silver | 15           | -52.7              |           | EU Joint Research Center | yes              | 17.24 ± 3.17              |

<sup>1</sup>TEM, transmission electron microscopy;

<sup>2</sup>The diameter of nanoparticles was determined by dynamic light scattering (DLS).

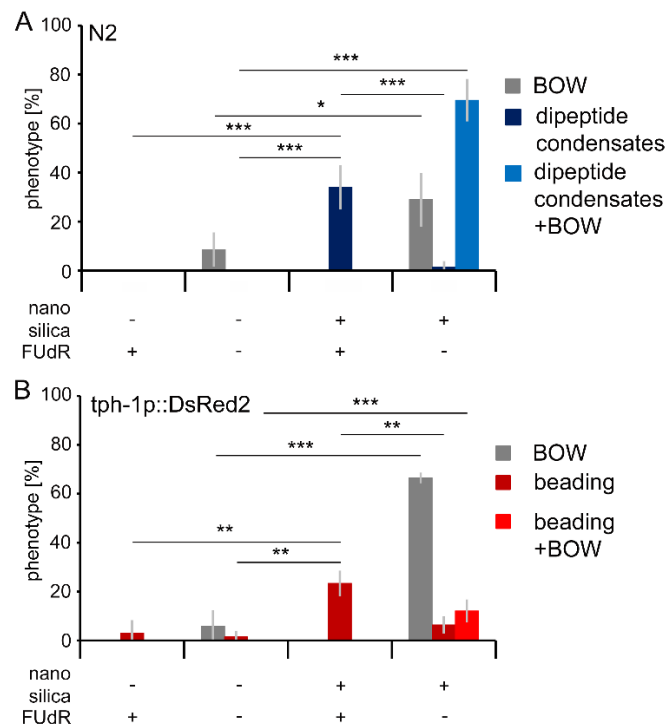

**Figure S4. Correlation of the phenotype internal hatch with dipeptide condensation and neural beading in serotonergic neurons.** Wild-type (N2) worms (A) or *tph-1p::DsRed2* reporter worms (B) were mock-exposed or exposed to 200  $\mu\text{g}/\text{mL}$  nano silica for 26 h with or without FUDR. FUDR treatment suppressed the BOW-phenotype in both strains. (A) Quantification of the BOW-phenotype and dipeptide condensates in 2-day-old, adult wild-type. Nano silica-induced dipeptide condensation occurred simultaneously with the BOW-phenotype (without FUDR). Values represent means  $\pm$  SD from three experiments with  $n=16-23$  for per condition per treatment (Two-way ANOVA with Tukey's post hoc test). (B) Quantification of the BOW-phenotype and neural beading in 2-day-old *tph-1p::DsRed2* reporters. Beading in serotonergic neurons occurred independently of the BOW-phenotype. Values represent means  $\pm$  SD from three experiments with  $n=16-33$  for per condition per treatment (Two-way ANOVA with Tukey's post hoc test). Beading, discontinuous fluorescence pattern of dendrites; BOW, bag-of-worms; FUDR; 5-fluoro-2'-deoxyuridine; \*,  $p<0.05$ ; \*\*,  $p<0.01$ ; \*\*\*,  $p<0.001$ .

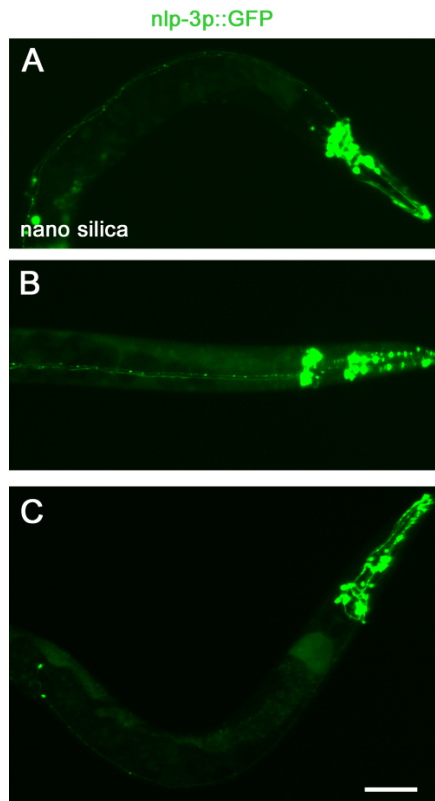

**Figure S5. Different neurodegenerative fluorescence patterns of the *nlp-3p::GFP* reporter nematode.** Representative fluorescent micrographs of 8-day-old, adult *C. elegans* expressing the green fluorescent protein (GFP) under the control of the neuropeptide-like protein (*nlp-3*) promoter in HSN (left) and head neurons (right). Reporter *C. elegans* were treated with 200 µg/ mL nano silica at 20 °C. Nano silica-exposed worms show different fluorescent patterns/ phenotypes: (A) beading (puncta) in the HSN axon, (B) beading (puncta) in the HSN axon and head neurons and (C) loss of neuropeptide expression in the HSN axon. Bar, 50 µm.

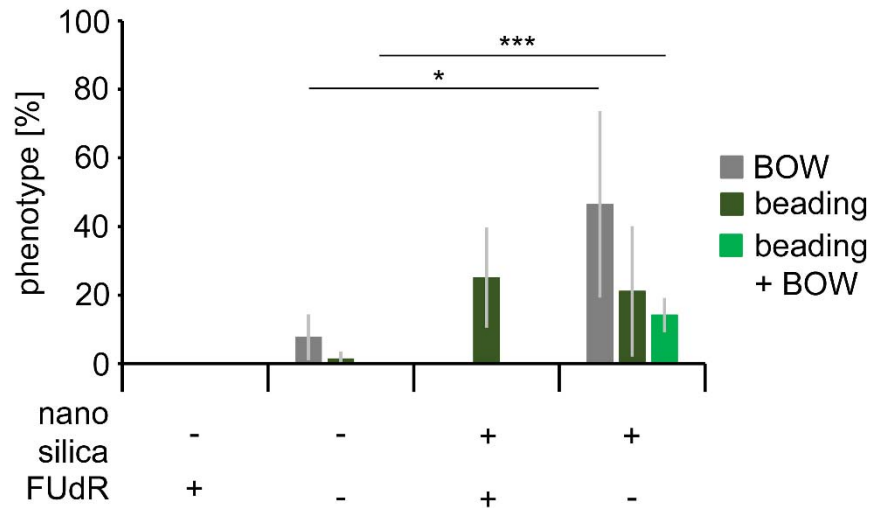

**Figure S6. Correlation of the internal hatch phenotype with axonal beading of HSN neurons.**

Quantification of the BOW-phenotype and axonal beading in 2-day-old, adult *nlp-3p::GFP* reporter nematodes that were mock-exposed or exposed to 200 µg/ mL nano silica for 26 h with or without FUdR. The FUdR treatment suppressed the BOW-phenotype. Axonal beading in the HSN occurred independently of the BOW-phenotype. Values represent means ± SD from three experiments with n=20-30 for per condition per treatment (Two-way ANOVA with Tukey's post hoc test). BOW, bag-of-worms; FUdR, 5-fluoro-2'-deoxyuridine; \*, p<0.05; \*\*\*, p<0.001.
